# Supplementary material
Source: PubMed Central journal article supplement (PMC4160267)
Supplement: nl502606q_si_001.pdf [file nl502606q_si_001.pdf]

**Supplementary Materials for “Studies of hot photoluminescence in plasmonically-coupled silicon via variable energy excitation and temperature dependent spectroscopy”**

*Carlos O. Aspetti †, Chang-Hee Cho \*\* §, Rahul Agarwal †, Ritesh Agarwal \* †*

† Department of Materials Science and Engineering, University of Pennsylvania, Philadelphia PA 19104, USA

§ DGIST-LBNL Joint Research Center & Department of Emerging Materials Science, Daegu Gyeongbuk Institute of Science and Technology (DGIST), Daegu 711-873, Korea

**Corresponding Authors**

\* (R.A.) Corresponding author. E-mail: [riteshag@seas.upenn.edu](mailto:riteshag@seas.upenn.edu)

\*\* (C.H.C.) Corresponding author. Email: [chcho@dgist.ac.kr](mailto:chcho@dgist.ac.kr)

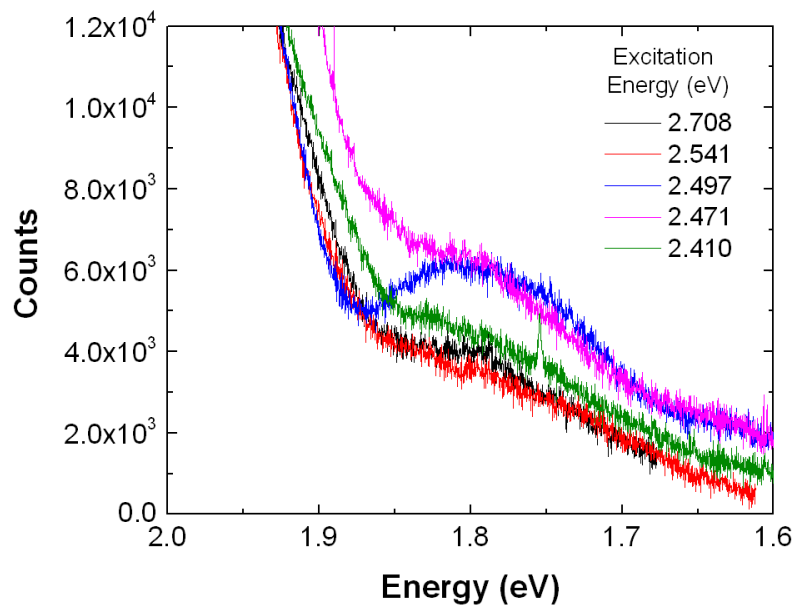

**Figure S1.** Magnified photoluminescence spectra of d=150 nm plasmonically-coupled silicon nanowire in low energy region demonstrating emission below the silicon bandgap at the L-point.

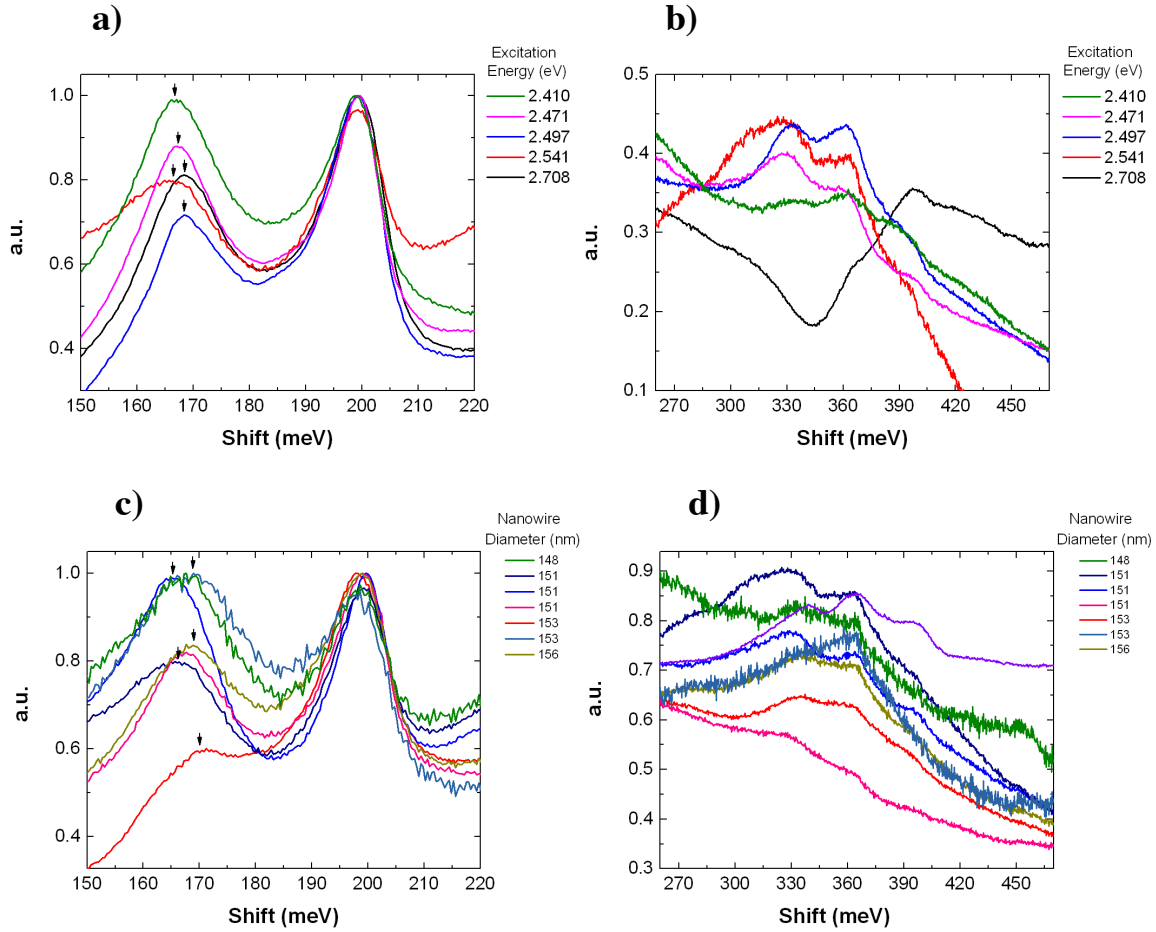

**Figure S2.** Variation in spectral positions of subpeaks in photoluminescence spectrum of plasmonically-coupled silicon nanowire. (a) variation in band A and (b) band B as a function of excitation energy for a single silicon nanowire size ( $d=150$  nm). (c) variation in spectral positions of band A and (d) band B for several nanowire sizes as a function of excitation energy. Black arrows denotes location of peak 1.
